# Supplementary material
Source: publisher figshare collection journal article supplement (https://acs.figshare.com/ndownloader/files/3769525)
Supplement: Supplementary file 1 [file 3769525]

## **SUPPORTING INFORMATION**

### **Near Room-Temperature, Fast-Response and Highly Sensitive Triethylamine Sensor Assembled with Au-Loaded ZnO/SnO<sub>2</sub> Core-Shell Nanorods on Flat Alumina Substrates**

Dian-Xing Ju, Hong-Yan Xu, Zhi-Wen Qiu, Zi-Chao Zhang, Qi-Xu, Jun Zhang, Jie-Qiang Wang, Bing-Qiang Cao\*

*Laboratory of Inorganic Functional Materials, School of Materials Science and Engineering, University of Jinan, Jinan 250022, Shandong, China*

\*To whom all correspondence should be addressed.

Email: mse\_caobq@ujn.edu.cn

Fax:+86-531-8797-4453; Tel:+86-531-8973-6292

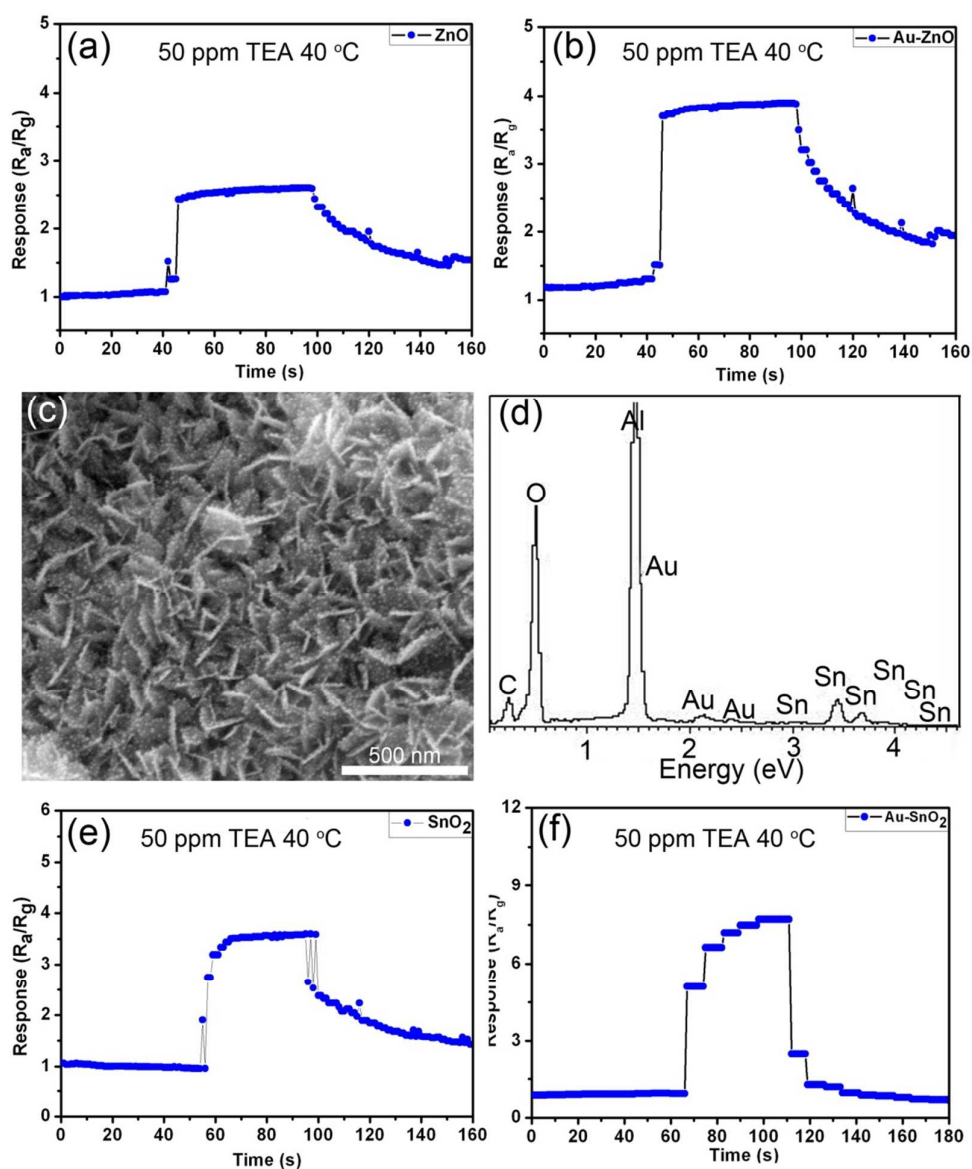

Figure S1. Response and recovery curve of three control sensors, (a) ZnO nanorod sensor; (b) Au-ZnO nanorod sensor; (c) SEM images of Au-SnO<sub>2</sub> nanosheets; (d) EDS spectrum of Au-SnO<sub>2</sub> nanosheets; (e) SnO<sub>2</sub> nanosheet sensor; (f) Au-SnO<sub>2</sub> nanosheet sensor.

The responses of three control ZnO, Au-ZnO and Au-SnO<sub>2</sub> sensors towards TEA gas were also investigated, as shown in Figure S1. With the similar hydrothermal protocol, the synthesis of SnO<sub>2</sub> nanorods was

difficult. But, SnO<sub>2</sub> nanosheets were synthesized by hydrothermal method and the SEM images of SnO<sub>2</sub> nanosheets is shown in Figure S1(c). The

response of pure ZnO or SnO<sub>2</sub> sensor to TEA gas is rather low. Au nanoparticles-loading can enhance their response. However, the response of Au-SnO<sub>2</sub>/ZnO sensor is the highest, as shown in Table 1 and Figure 5-9.

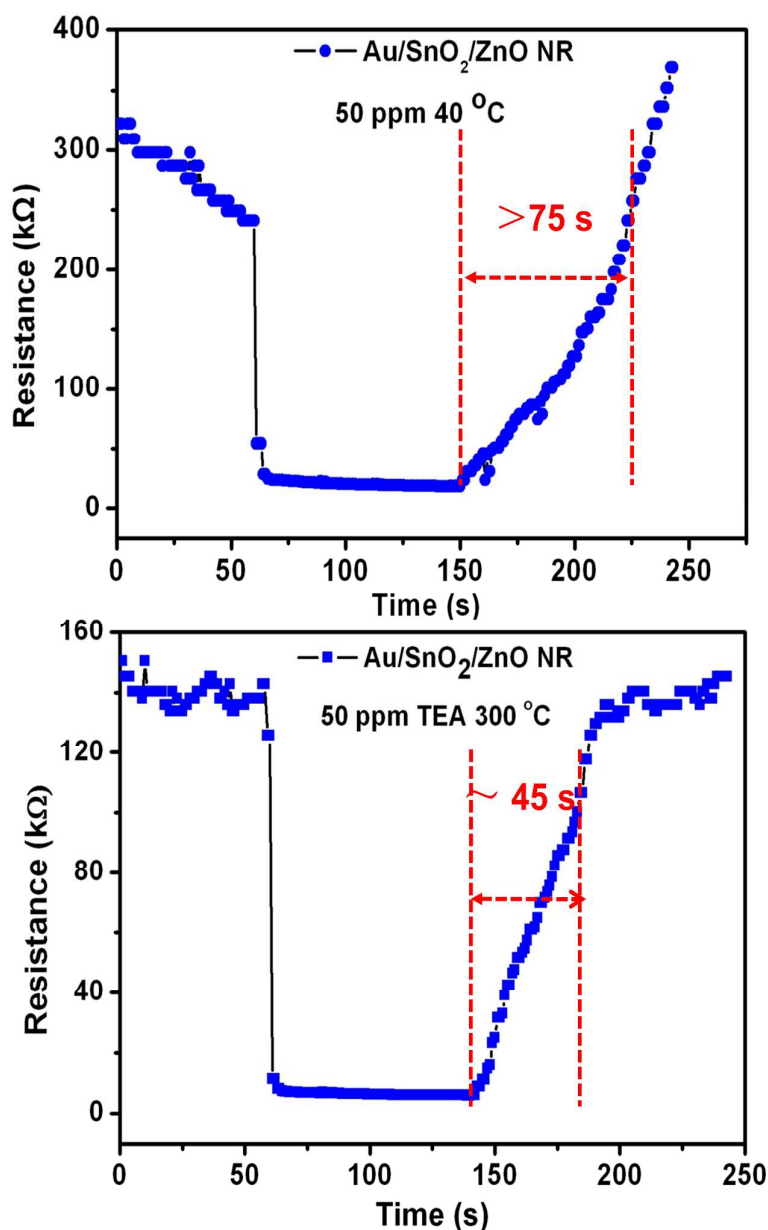

Figure S2. The response-recovery curves of the Au-SnO<sub>2</sub>/ZnO nanorod sensor to 50 ppm TEA working at different temperature.

Figure S2 exhibits the response-recovery curves of the Au-SnO<sub>2</sub>/ZnO nanorod sensor to 50 ppm TEA working at different temperature. It can be seen that the recovery time decrease clearly when the sensor worked at 300 °C.

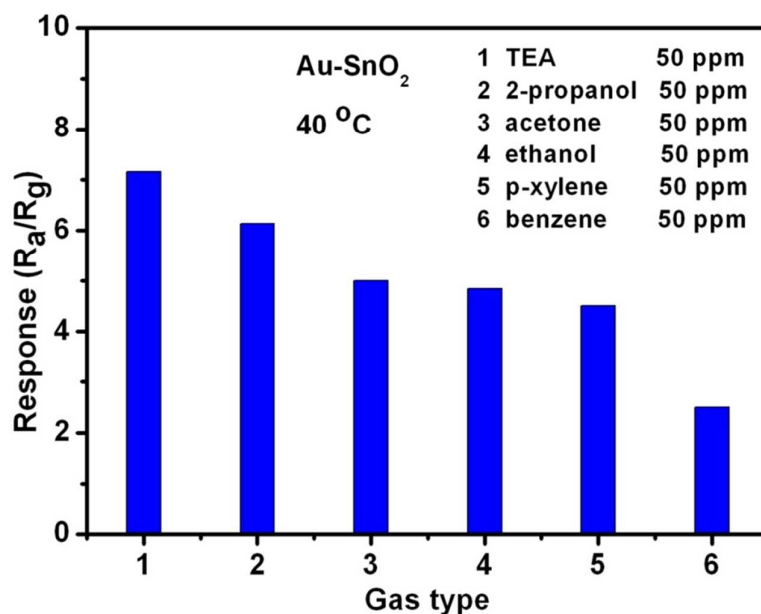

Figure S3. The selectivity of the Au-SnO<sub>2</sub> sensor towards different gases.

In order to further investigate the influence of Au nanoparticles on selectivity, we also measured the selectivity of Au-SnO<sub>2</sub> towards different gases, as shown in Figure S3. It can be seen clearly that there is a little difference of response among these gases, such as TEA, 2-propanol and acetone. But, the selectivity of Au-SnO<sub>2</sub>/ZnO sensor in Figure 8 is more impressive.
